# Supplementary material for: Fabrication of covalently crosslinked and amine-reactive microcapsules by reactive layer-by-layer assembly of azlactone-containing polymer multilayers on sacrificial microparticle templates
Source: Royal Society of Chemistry journal article supplement (doi:10.1039/c0jm02633f), 2010-10-21
Supplement: c0jm02633f.pdf [file c0jm02633f.pdf]

## Fabrication of Covalently Crosslinked and Amine-Reactive Microcapsules by Reactive Layer-by-Layer Assembly of Azlactone-Containing Polymer Multilayers on Sacrificial Microparticle Templates

Eric M. Saurer,<sup>a,1</sup> Ryan M. Flessner,<sup>a,1</sup> Maren E. Buck,<sup>b</sup> and David M. Lynn<sup>a,b,\*</sup>

Departments of <sup>a</sup>Chemical and Biological Engineering and <sup>b</sup>Chemistry, University of Wisconsin – Madison, 1415 Engineering Drive, Madison, WI 53706, USA

<sup>1</sup>These authors contributed equally to this work.

### Supporting Information

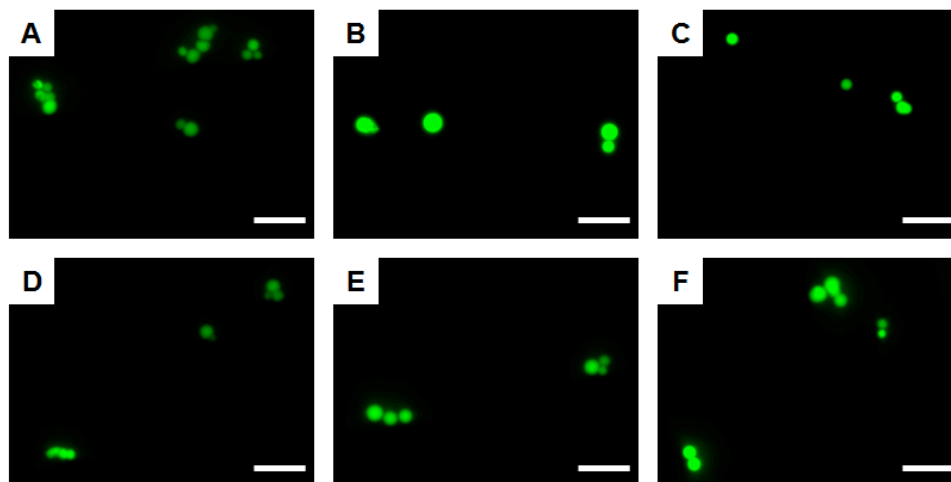

**Figure S1.** Representative fluorescence microscopy images of hollow capsules fabricated by the fabrication of films on  $\text{CaCO}_3$  cores containing FITC-dextran, followed by removal of the cores (see text). The capsules were suspended in (A) saturated aqueous NaCl, (B) 5 M HCl, (C) 5 M NaOH, (D) acetone, (E) dichloromethane, or (F) methanol for 22 hours. Capsules suspended in NaCl, HCl, and NaOH were rinsed twice in deionized water prior to imaging. Scale bars = 20  $\mu\text{m}$ .
